# Supplementary figures and images for: Long‐term salinity tolerance is accompanied by major restructuring of the coral bacterial microbiome
Source: PubMed Central journal article supplement — Mol Ecol. 2016 Mar 1;25(6):1308–23. doi: 10.1111/mec.13567 (PMC4804745; doi:10.1111/mec.13567), 2016-03-01

12 m (depth)

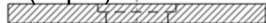

1.8 m

3 m

18 m (depth)

0 m

2.5 m

5 m

15 m

25 m

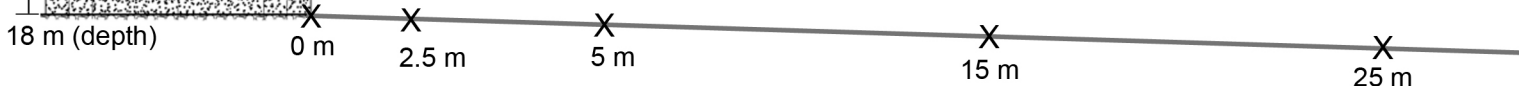

Supplement: MEC-25-1308-s001.pdf [file MEC-25-1308-s001.pdf]

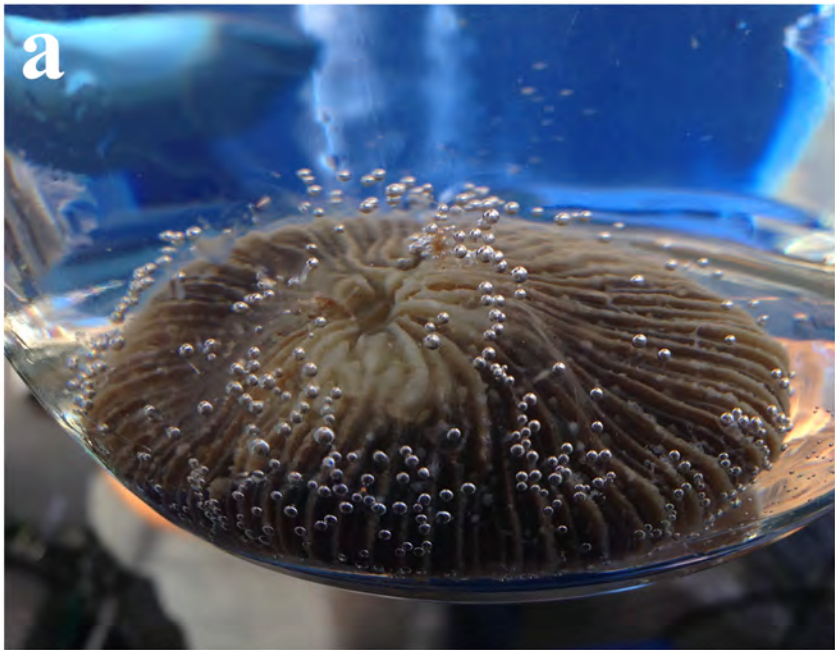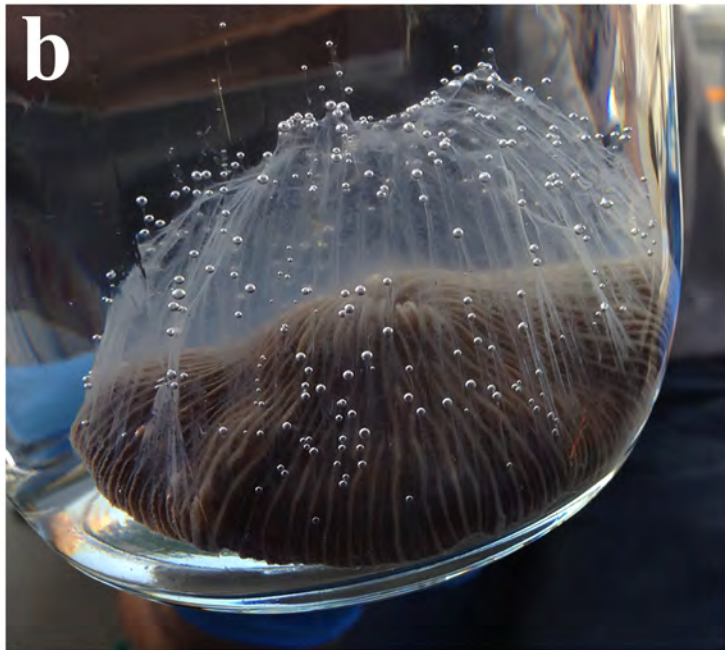

Supplement: MEC-25-1308-s002.pdf [file MEC-25-1308-s002.pdf]

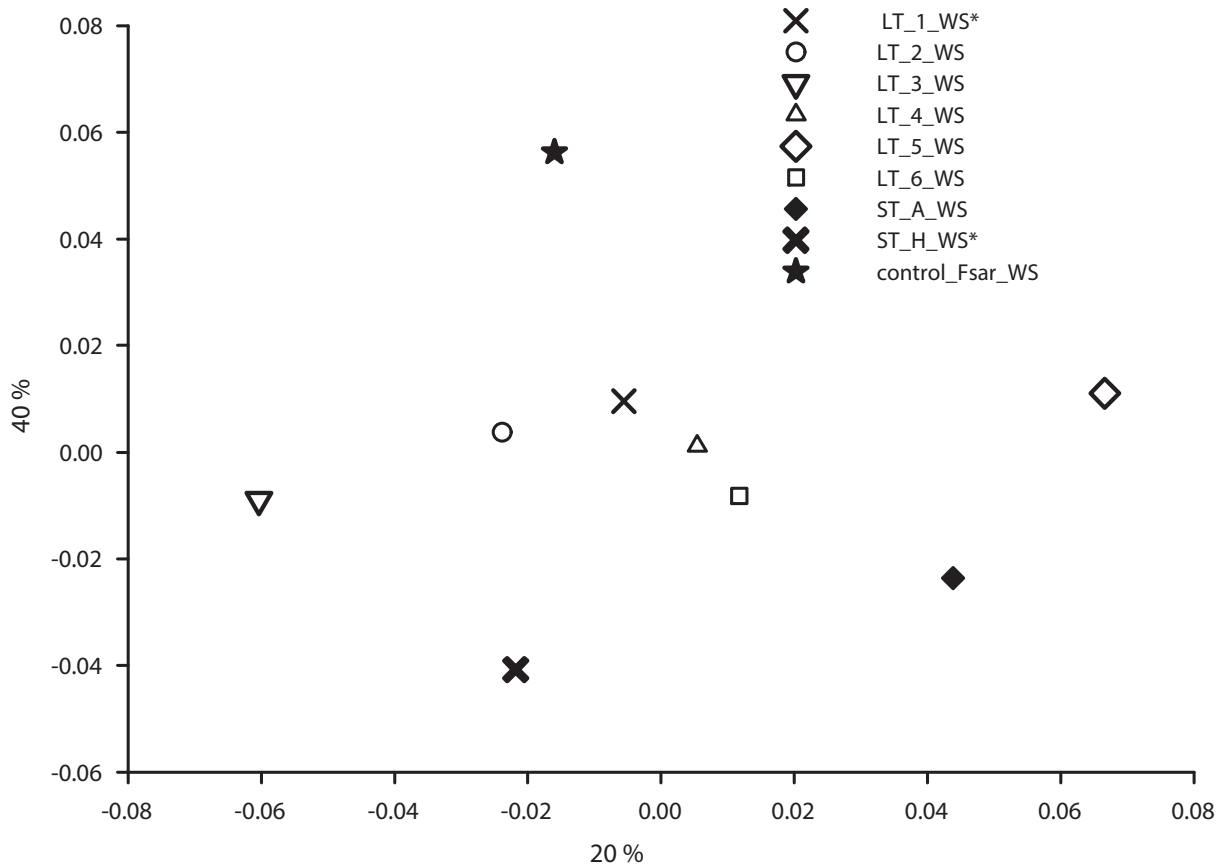

Supplement: MEC-25-1308-s003.pdf [file MEC-25-1308-s003.pdf]

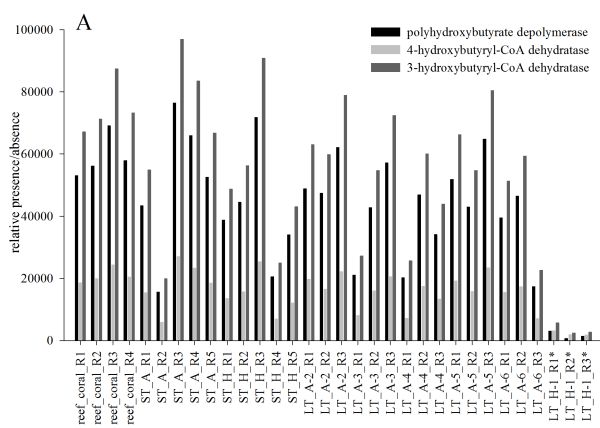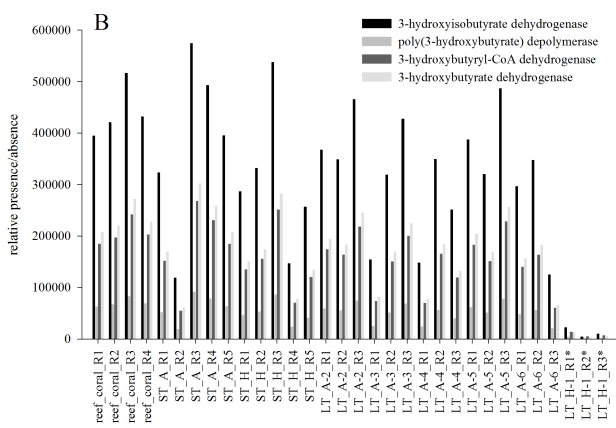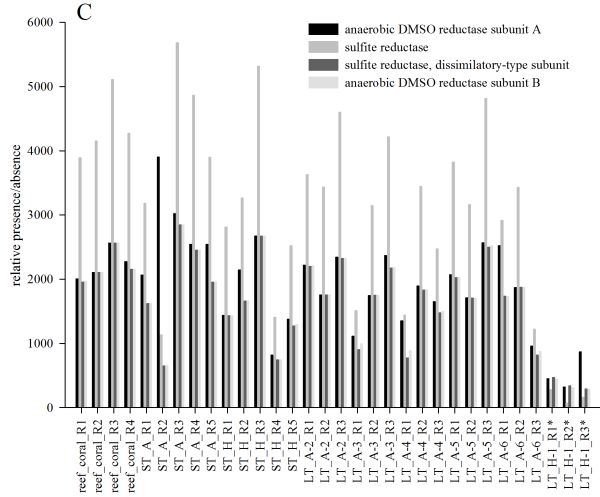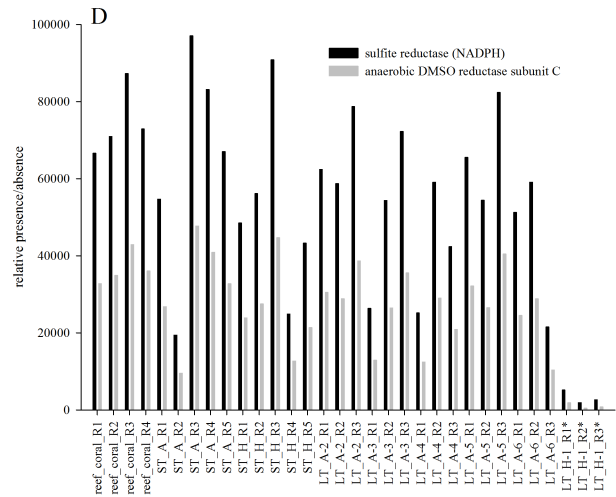

Supplement: MEC-25-1308-s004.pdf [file MEC-25-1308-s004.pdf]
